# Supplementary material
Source: HighWire-hosted journal article supplement (http://ajnr-stage2.highwire.org/highwire/filestream/51992/field_highwire_adjunct_files/0/2282_tables.pdf)
Supplement: 2282_tables.pdf [file 2282_tables.pdf]

**On-line Table 1: Comparison of demographic data of residual positive or negative outliers for CTA with CBF**

| Demographics                                                 |                  | No. | Mean             | P Value <sup>a</sup> |
|--------------------------------------------------------------|------------------|-----|------------------|----------------------|
| Age (mean, yr)                                               | Nonoutlier       | 47  | 68.4 ± 15.6      |                      |
|                                                              | Positive outlier | 9   | 70.3 ± 10.4      | .893                 |
|                                                              | Negative outlier | 8   | 68.5 ± 10.9      | .607                 |
| Male sex (No.) (%)                                           | Nonoutlier       | 47  | 26 (55%)         |                      |
|                                                              | Positive outlier | 9   | 4 (44%)          | .718                 |
|                                                              | Negative outlier | 8   | 5 (63%)          | .705                 |
| rtPA administration (No.) (%)                                | Nonoutlier       | 47  | 34 (72%)         |                      |
|                                                              | Positive outlier | 9   | 5 (56%)          | .431                 |
|                                                              | Negative outlier | 8   | 7 (88%)          | .663                 |
| ASPECTS (median, Q1–Q3)                                      | Nonoutlier       | 47  | 7.0 (6–9)        |                      |
|                                                              | Positive outlier | 9   | 5.0 (4–6)        | .002                 |
|                                                              | Negative outlier | 8   | 7.0 (5–9)        | .634                 |
| NIHSS score (median, Q1–Q3)                                  | Nonoutlier       | 47  | 12.0 (7–18)      |                      |
|                                                              | Positive outlier | 9   | 17.0 (12–20)     | .143                 |
|                                                              | Negative outlier | 8   | 18 (16–20.5)     | .296                 |
| Onset to CT scan (median, Q1–Q3; min)                        | Nonoutlier       | 44  | 110.0 (77.5–149) |                      |
|                                                              | Positive outlier | 9   | 80.0 (60–115)    | .120                 |
|                                                              | Negative outlier | 8   | 111.0 (87.5–147) | .949                 |
| Time of bolus trigger to midinfarct (median, Q1–Q3; seconds) | Nonoutlier       | 44  | 21.0 (16–32)     |                      |
|                                                              | Positive outlier | 9   | 39.0 (23–42)     | .138                 |
|                                                              | Negative outlier | 8   | 32.5 (14.5–47)   | .477                 |
| Recanalization (No.) (%)                                     | Nonoutlier       | 47  | 26 (55%)         |                      |
|                                                              | Positive outlier | 9   | 6 (67%)          | .717                 |
|                                                              | Negative outlier | 8   | 5 (63%)          | .705                 |

<sup>a</sup> P value was obtained by the Wilcoxon rank sum test (for continuous variables) and the Fisher exact test (for categoric variables) to compare non-outlier patients with positive outliers and non-outlier patients with negative outliers.

**On-line Table 2: Comparison of demographic data of residual positive or negative outliers for PCCT with CBV**

| Demographics                          |                  | No. | Mean             | P Value <sup>a</sup> |
|---------------------------------------|------------------|-----|------------------|----------------------|
| Age (mean, yr)                        | Nonoutlier       | 48  | 68.5 ± 13.7      |                      |
|                                       | Positive outlier | 8   | 62.4 ± 17.3      | .286                 |
|                                       | Negative outlier | 8   | 76.4 ± 13.4      | .152                 |
| Male sex (No.) (%)                    | Nonoutlier       | 48  | 27 (56%)         |                      |
|                                       | Positive outlier | 8   | 4 (50%)          | .742                 |
|                                       | Negative outlier | 8   | 4 (50%)          | .742                 |
| rtPA administration (No.) (%)         | Nonoutlier       | 48  | 35 (73%)         |                      |
|                                       | Positive outlier | 8   | 4 (50%)          | .227                 |
|                                       | Negative outlier | 8   | 7 (88%)          | .663                 |
| ASPECTS (median, Q1–Q3)               | Nonoutlier       | 48  | 7.0 (6–9)        |                      |
|                                       | Positive outlier | 8   | 7.5 (5–8.5)      | .962                 |
|                                       | Negative outlier | 8   | 6.0 (6–8.5)      | .990                 |
| NIHSS score (median, Q1–Q3)           | Nonoutlier       | 48  | 16.00 (10–18.5)  |                      |
|                                       | Positive outlier | 8   | 8.0 (4.5–15.5)   | .142                 |
|                                       | Negative outlier | 8   | 12.5 (11–19)     | .934                 |
| Onset to CT scan (median, Q1–Q3; min) | Nonoutlier       | 46  | 117.50 (80–157)  |                      |
|                                       | Positive outlier | 7   | 80.0 (69–100)    | .026                 |
|                                       | Negative outlier | 8   | 102.5 (64.5–183) | .826                 |
| Recanalization (No.) (%)              | Nonoutlier       | 46  | 26 (55%)         |                      |
|                                       | Positive outlier | 8   | 4 (50%)          | .742                 |
|                                       | Negative outlier | 8   | 6 (75%)          | 0.449                |

<sup>a</sup> P value was obtained by the Wilcoxon rank sum test (for continuous variables) and the Fisher exact test (for categoric variables) to compare non-outlier patients with positive outliers and non-outlier patients with negative outliers.
